# Supplementary material for: Association of lipid-lowering drugs with COVID-19 outcomes from a Mendelian randomization study
Source: eLife. 2021 Dec 6;10:e73873. doi: 10.7554/eLife.73873 (PMC8709572; doi:10.7554/eLife.73873)
Supplement: Supplementary file 1. [file elife-73873-supp1.xlsx]

## Sheet: Legend
Contents:
Supplementary file 1-Table 1. Information of eQTL and GWAS summary data.
Supplementary file 1-Table 2. SMR association between expression of gene HMGCR, PCSK9, or NPC1L1 and COVID-19 outcomes.
Supplementary file 1-Table 3. Information of genetic instrumental variants associated with LDL cholesterol located within 100 kb windows from gene HMGCR, PCSK9 or NPC1L1.
Supplementary file 1-Table 4. IVW-MR association between LDL cholesterol mediated by gene HMGCR, PCSK9, or NPC1L1and COVID-19 outcomes.
Supplementary file 1-Table 5. SMR association between expression of gene HMGCR, PCSK9, or NPC1L1 and LDL cholesterol level.
Supplementary file 1-Table 6. IVW-MR association between LDL cholesterol mediated by gene HMGCR, PCSK9, or NPC1L1 and coronary heart disease.
Supplementary file 1-Table 7. Association between eQTL top SNP of HMGCR with expression of other nearby genes (p<0.05).
Supplementary file 1-Table 8. SMR association between expression of genes adjactent to HMGCR and COVID-19 outcomes.
Supplementary file 1-Table 9. Association between LDL cholesterol mediated by gene HMGCR and previously reported risk factors for COVID-19 hospitalization.
Supplementary file 1-Table 10. Association between LDL cholesterol mediated by gene HMGCR and COVID-19 hospitalization adjusted for BMI, diabetes or CHD in multivariable MR analysis.

## Sheet: Table 1
Supplementary file 1-Table 1. Information of eQTL and GWAS summary data.
Characteristic	Resource	Sample size	Population ancestry	Reference	Data download
eQTL data
eQTL for HMGCR	eQTLGen Consortium	Whole blood: 31684	Predominantly European	Võsa, U., Claringbould, A.,Franke, L, et al(2018): Unraveling the polygenic architecture of complex traits using blood eQTL meta-analysis. https://www.biorxiv.org/content/10.1101/447367v1	https://www.eqtlgen.org/cis-eqtls.html
eQTL in PCSK9, NPC1L1	GTExV8	Whole blood: 755 Adipose Subcutaneous: 663	Predominantly European	GTEx Consortium, et al (2017): Genetic effects on gene expression across human tissues. https://www.ncbi.nlm.nih.gov/pubmed/29022597/	https://www.gtexportal.org/home/datasets
GWAS summary data
COVID-19 susceptibility	COVID-19 Host Genetics Initiative	Number of cases:14,134 Number of controls: 1,284,876	European	COVID-19 Host Genetics Initiative (2020).The COVID-19 Host Genetics Initiative, a global initiative to elucidate the role of host genetic factors in susceptibility and severity of the SARS-CoV-2 virus pandemic. https://pubmed.ncbi.nlm.nih.gov/32404885/	https://www.covid19hg.org/results/r4/
COVID-19 hospitalization	COVID-19 Host Genetics Initiative	Number of cases:6,406 Number of controls: 902,088	European	COVID-19 Host Genetics Initiative (2020).The COVID-19 Host Genetics Initiative, a global initiative to elucidate the role of host genetic factors in susceptibility and severity of the SARS-CoV-2 virus pandemic. https://pubmed.ncbi.nlm.nih.gov/32404885/	https://www.covid19hg.org/results/r4/
COVID-19 very severe respiratory disease	COVID-19 Host Genetics Initiative	Number of cases:3,886 Number of controls: 622,265	European	COVID-19 Host Genetics Initiative (2020).The COVID-19 Host Genetics Initiative, a global initiative to elucidate the role of host genetic factors in susceptibility and severity of the SARS-CoV-2 virus pandemic. https://pubmed.ncbi.nlm.nih.gov/32404885/	https://www.covid19hg.org/results/r4/
LDL cholesterol	Global Lipids Genetics Consortium	Number of cases and controls:173,082	Predominantly European	Cristen J Willer, Ellen M Schmidt, Sebanti Sengupta, et al (2013): Discovery and refinement of loci associated with lipid levels. https://pubmed.ncbi.nlm.nih.gov/24097068/	http://csg.sph.umich.edu/willer/public/lipids2013/
Coronary heart disease	CARDIoGRAMplusC4D Consortium	Number of cases:60,801 Number of controls: 123,504	Predominantly European	Majid Nikpay, Anuj Goel, Hong-Hee Won, et al (2015): A comprehensive 1,000 Genomes-based genome-wide association meta-analysis of coronary artery disease. https://pubmed.ncbi.nlm.nih.gov/26343387/	http://www.cardiogramplusc4d.org/

## Sheet: Table 2
Supplementary file 1-Table 2. SMR association between expression of gene HMGCR, PCSK9, or NPC1L1 and COVID-19 outcomes.
Gene	Gene chromosome	Gene base pair	Probe	top eQTL SNP	SNP Chromosome	SNP base pair	Effect allele	Other allele	Effect allele frequency	eQTL association						GWAS association					SMR association				HEIDI Test
										Tissue	beta	se	p-value	F-statistic		Outcome	beta	se	p-value		beta	se	p-value		p-value	Number of SNPs
HMGCR	5	74645041	ENSG00000113161	rs6453133	5	74692776	G	A	0.286299	Blood	0.127763	0.00853654	1.2137e-50	223.999		COVID-19 susceptibility	0.033482	0.013851	0.0156401		0.262063	0.109817	0.0170155		0.00858575	20
HMGCR	5	74645041	ENSG00000113161	rs6453133	5	74692776	G	A	0.286299	Blood	0.127763	0.00853654	1.2137e-50	223.999		COVID-19 hospitalization	0.041252	0.017302	0.0171199		0.322879	0.13713	0.0185455		0.0153213	20
HMGCR	5	74645041	ENSG00000113161	rs6453133	5	74692776	G	A	0.286299	Blood	0.127763	0.00853654	1.2137e-50	223.999		COVID-19 very severe respiratory disease	0.034363	0.030008	0.2522		0.268959	0.235559	0.253541		0.538241	20
PCSK9	1	55517873	ENSG00000169174.10	rs472495	1	55521313	T	G	0.627812	Blood	0.187357	0.0251219	8.79e-14	55.6205		COVID-19 susceptibility	-0.032266	0.013139	0.0140602		-0.172217	0.0738322	0.0196722		0.696671	8
PCSK9	1	55517873	ENSG00000169174.10	rs472495	1	55521313	T	G	0.627812	Blood	0.187357	0.0251219	8.79e-14	55.6205		COVID-19 hospitalization	-0.018321	0.016151	0.2566		-0.0977866	0.0871959	0.262093		0.772533	8
PCSK9	1	55517873	ENSG00000169174.10	rs472495	1	55521313	T	G	0.627812	Blood	0.187357	0.0251219	8.79e-14	55.6205		COVID-19 very severe respiratory disease	-0.03071	0.029014	0.2898		-0.163912	0.156411	0.29466		0.455655	8
NPC1L1	7	44566532	ENSG00000015520.14	rs41279633	7	44580876	T	G	0.144172	Adipose Subcutaneous	0.473374	0.053938	1.68999e-18	77.0228		COVID-19 susceptibility	0.031762	0.018477	0.0856091		0.0670971	0.0397743	0.0916136		0.0584829	5
NPC1L1	7	44566532	ENSG00000015520.14	rs41279633	7	44580876	T	G	0.144172	Adipose Subcutaneous	0.473374	0.053938	1.68999e-18	77.0228		COVID-19 hospitalization	0.020943	0.022593	0.354		0.044242	0.0479931	0.356612		0.0663965	5
NPC1L1	7	44566532	ENSG00000015520.14	rs41279633	7	44580876	T	G	0.144172	Adipose Subcutaneous	0.473374	0.053938	1.68999e-18	77.0228		COVID-19 very severe respiratory disease	0.012078	0.039819	0.7617		0.0255147	0.0841676	0.761782		0.486111	5

## Sheet: Table 3
Supplementary file 1-Table 3. Information of genetic instrumental variants associated with LDL cholesterol located within 100 kb windows from gene HMGCR, PCSK9 or NPC1L1.
SNP	Chromosome	Base pair	Effect allele	Other allele	Effect allele frequency	beta	se	p value	F-statistic
HMGCR
rs12916	5	74656539	C	T	0.4314	0.0733	0.0038	7.79112e-78	372.084
rs3804231	5	74696779	A	G	0.1319	0.0642	0.0053	1.88408e-29	146.73
rs10515198	5	74641560	A	G	0.1029	0.0599	0.0061	5.98963e-22	96.426
rs10066707	5	74560579	A	G	0.4169	0.0497	0.0054	2.97303e-19	84.7082
rs12659791	5	74757758	C	T	0.1557	0.0433	0.005	1.422e-18	74.9956
rs72633962	5	74569028	C	T	0.1412	0.06	0.0072	3.32736e-15	69.4444
rs3857388	5	74620377	C	T	0.128	0.0421	0.0059	2.2009e-11	50.9167
PCSK9
rs11591147	1	55505647	T	G	0.01715	-0.497	0.018	8.57038e-143	762.373
rs11206510	1	55496039	C	T	0.1544	-0.0831	0.005	2.38013e-53	276.224
rs2479409	1	55504650	A	G	0.6675	-0.0642	0.0041	2.51478e-50	245.19
rs585131	1	55524116	T	C	0.8153	0.0637	0.005	2.69898e-35	162.308
rs11206514	1	55516004	A	C	0.6108	0.0507	0.0041	9.94947e-33	152.914
rs572512	1	55517344	T	C	0.3456	0.0478	0.0047	5.30884e-26	103.433
rs2479394	1	55486064	A	G	0.715	-0.0386	0.0041	1.58416e-19	88.6353
rs12067569	1	55528629	A	G	0.0343	0.0885	0.01	1.96607e-17	78.3225
rs10493176	1	55538552	G	T	0.1148	-0.0776	0.0102	2.53513e-14	57.8793
rs4927193	1	55509872	C	T	0.1306	-0.0352	0.0056	4.26874e-11	39.5102
rs11583974	1	55551718	A	G	0.03034	0.0646	0.0117	3.95103e-09	30.4855
rs2495495	1	55496556	C	T	0.8654	-0.0342	0.0059	3.51998e-08	33.6007
NPC1L1
rs2073547	7	44582331	G	A	0.1939	0.0485	0.0049	1.92309e-21	97.9696
rs217386	7	44600695	A	G	0.4077	-0.0363	0.0038	1.20393e-19	91.2528
rs7791240	7	44602589	C	T	0.09103	0.0425	0.0065	1.83802e-10	42.7515

## Sheet: Table 4
Supplementary file 1-Table 4. IVW-MR association between LDL cholesterol mediated by gene HMGCR, PCSK9, or NPC1L1and COVID-19 outcomes.
Exposure	Outcome	Method	Number of SNPs	beta	se	p value	p value for Cochran Q test	p value for MR-Egger intercept	p value for MR-PRESSO Global test
HMGCR	COVID-19 suscepbility	Inverse variance weighted	7	0.0829028	0.112459	0.461011	0.65399	0.941523	0.716
HMGCR	COVID-19 hospitalization	Inverse variance weighted	7	0.277598	0.141059	0.0490733	0.891478	0.677508	0.908
HMGCR	COVID-19 very severe respiratory disease	Inverse variance weighted	7	0.21107	0.243695	0.386423	0.664821	0.721771	0.699
PCSK9	COVID-19 suscepbility	Inverse variance weighted	12	-0.0114243	0.0713336	0.87276	0.917225	0.2841	0.843
PCSK9	COVID-19 hospitalization	Inverse variance weighted	12	0.0265409	0.0852968	0.755679	0.935687	0.115522	0.77
PCSK9	COVID-19 very severe respiratory disease	Inverse variance weighted	12	-0.0181223	0.172247	0.916209	0.714313	0.498046	0.727
NPC1L1	COVID-19 suscepbility	Inverse variance weighted	3	0.702007	0.224546	0.00176999	0.751988	0.813572	N/A
NPC1L1	COVID-19 hospitalization	Inverse variance weighted	3	0.517697	0.279907	0.0643809	0.829575	0.699832	N/A
NPC1L1	COVID-19 very severe respiratory disease	Inverse variance weighted	3	0.704499	0.477431	0.14005	0.372121	0.395945	N/A

## Sheet: Table 5
Supplementary file 1-Table 5. SMR association between expression of gene HMGCR, PCSK9, or NPC1L1 and LDL cholesterol level.
Exposure	OR	95%CI	p value	Tissue
HMGCR	1.47551	1.36-1.6	1.17814e-21	Blood
PCSK9	1.44537	1.28-1.63	2.76775e-09	Blood
NPC1L1	1.11493	1.07-1.16	1.30296e-08	Adipose Subcutaneous

## Sheet: Table 6
Supplementary file 1-Table 6. IVW-MR association between LDL cholesterol mediated by gene HMGCR, PCSK9, or NPC1L1 and coronary heart disease.
Exposure	OR	95%CI	p value
HMGCR	1.44428	1.24-1.68	2.17884e-06
PCSK9	1.66565	1.44-1.92	3.54397e-12
NPC1L1	1.65529	1.2-2.28	0.00207443

## Sheet: Table 7
Supplementary file 1-Table 7. Association between eQTL top SNP of HMGCR with expression of other nearby genes (p<0.05).
Gene	Gene Chromosome	Gene position (hg19)	eQTL SNP	SNP Chromosome	SNP position (hg19)	base pair distance of gene from SNP	Effect allele	Other allele	Effect allele frequency	eQTL association
										beta	se	p-value
POC5	5	74991631	rs6453133	5	74692776	298855	G	A	0.313014	0.161208	0.00854761	2.43219e-79
HMGCR	5	74645041	rs6453133	5	74692776	-47735	G	A	0.313014	0.127763	0.00853654	1.2137e-50
ANKDD1B	5	74937477	rs6453133	5	74692776	244701	G	A	0.313014	-0.0353522	0.0102858	0.000588201
COL4A3BP	5	74736137	rs6453133	5	74692776	43361	G	A	0.313014	-0.0205491	0.00938402	0.0285387
POLK	5	74852275	rs6453133	5	74692776	159499	G	A	0.313014	0.0185376	0.00856637	0.0304643
ANKRD31	5	74448401	rs6453133	5	74692776	-244375	G	A	0.313014	-0.0228411	0.0116051	0.049045

## Sheet: Table 8
Supplementary file 1-Table 8. SMR association between expression of genes adjactent to HMGCR and COVID-19 outcomes.
Outcome	Gene	Gene chromosome	Gene base pair	top eQTL SNP	SNP Chromosome	SNP base pair	Effect allele	Other allele	Effect allele frequency	eQTL association					GWAS association				SMR association				HEIDI Test
										beta	se	p-value	F-statistic		beta	se	p-value		beta	se	p-value		p-value	Number of SNPs
COVID-19 susceptibility	HMGCR	5	74645041	rs6453133	5	74692776	G	A	0.286299	0.127763	0.00853654	1.2137e-50	223.999		0.033482	0.013851	0.0156401	0.262063	0.262063	0.109817	0.0170155		0.00858575	20
COVID-19 susceptibility	COL4A3BP	5	74736137	rs10515198	5	74641560	A	G	0.101227	-0.119116	0.0142993	8.07059e-17	69.3922		-0.022127	0.02173	0.3086	0.18576	0.18576	0.183785	0.312138		0.175573	20
COVID-19 susceptibility	ANKDD1B	5	74937477	rs6895057	5	74624234	A	G	0.258691	-0.0740506	0.0108451	8.61074e-12	46.6219		-0.007362	0.014303	0.6067	0.0994185	0.0994185	0.1937	0.607769		0.179722	8
COVID-19 susceptibility	POC5	5	74991631	rs113216064	5	74980830	T	C	0.184049	0.564987	0.00923427	0	3743.45		0.0050869	0.016049	0.751299	0.00900357	0.00900357	0.0284063	0.751277		0.450161	20
COVID-19 susceptibility	POLK	5	74852275	N/A
COVID-19 susceptibility	ANKRD31	5	74448401	N/A
COVID-19 hospitalization	HMGCR	5	74645041	rs6453133	5	74692776	G	A	0.286299	0.127763	0.00853654	1.2137e-50	223.999		0.041252	0.017302	0.0171199		0.322879	0.13713	0.0185455		0.0153213	20
COVID-19 hospitalization	COL4A3BP	5	74736137	rs10515198	5	74641560	A	G	0.101227	-0.119116	0.0142993	8.07059e-17	69.3922		0.0085643	0.02676	0.7489		-0.0718988	0.224821	0.749116		0.427792	20
COVID-19 hospitalization	ANKDD1B	5	74937477	rs6895057	5	74624234	A	G	0.258691	-0.0740506	0.0108451	8.61074e-12	46.6219		-0.0007867	0.017637	0.9644		0.0106238	0.23818	0.964423		0.246044	8
COVID-19 hospitalization	POC5	5	74991631	rs113216064	5	74980830	T	C	0.184049	0.564987	0.00923427	0	3743.45		0.028633	0.019597	0.144		0.050679	0.0346956	0.144105		0.0221717	20
COVID-19 hospitalization	POLK	5	74852275	N/A
COVID-19 hospitalization	ANKRD31	5	74448401	N/A
COVID-19 very severe respiratory disease	HMGCR	5	74645041	rs6453133	5	74692776	G	A	0.286299	0.127763	0.00853654	1.2137e-50	223.999		0.034363	0.030008	0.2522		0.268959	0.235559	0.253541		0.538241	20
COVID-19 very severe respiratory disease	COL4A3BP	5	74736137	rs10515198	5	74641560	A	G	0.101227	-0.119116	0.0142993	8.07059e-17	69.3922		-0.048574	0.046473	0.2959		0.407787	0.393208	0.2997		0.223416	20
COVID-19 very severe respiratory disease	ANKDD1B	5	74937477	rs6895057	5	74624234	A	G	0.258691	-0.0740506	0.0108451	8.61074e-12	46.6219		-0.0045077	0.031095	0.8847		0.0608732	0.42001	0.884764		0.63978	8
COVID-19 very severe respiratory disease	POC5	5	74991631	rs113216064	5	74980830	T	C	0.184049	0.564987	0.00923427	0	3743.45		-0.0062741	0.034768	0.8568		-0.0111049	0.061538	0.856795		0.771239	20
COVID-19 very severe respiratory disease	POLK	5	74852275	N/A
COVID-19 very severe respiratory disease	ANKRD31	5	74448401	N/A
*No eQTLs for POLK or ANKRD31 are available at a genome-wide significance level (p < 5.0 × 10-8).

## Sheet: Table 9
Supplementary file 1-Table 9. Association between LDL cholesterol mediated by gene HMGCR and previously reported risk factors for COVID-19 hospitalization.
Risk factor	GWAS resource	beta	se	p value
Body mass index	GIANT	-0.279759	0.0347932	8.93873e-16
Hypertention	MRC Integrative Epidemiology Unit	0.0039339	0.00637995	0.537496
Diabetes	MRC Integrative Epidemiology Unit	-0.0197569	0.00379431	1.91946e-07
Coronary heart disease	CARDIoGRAMplusC4D Consortium	0.367613	0.0776195	2.17884e-06

[truncated: 1 more sheets: Table 10]
